# Supplementary material for: Identification and validation of shared gene signature of kidney renal clear cell carcinoma and COVID-19
Source: PeerJ journal article supplement (doi:10.7717/peerj.16927), 2024-03-04

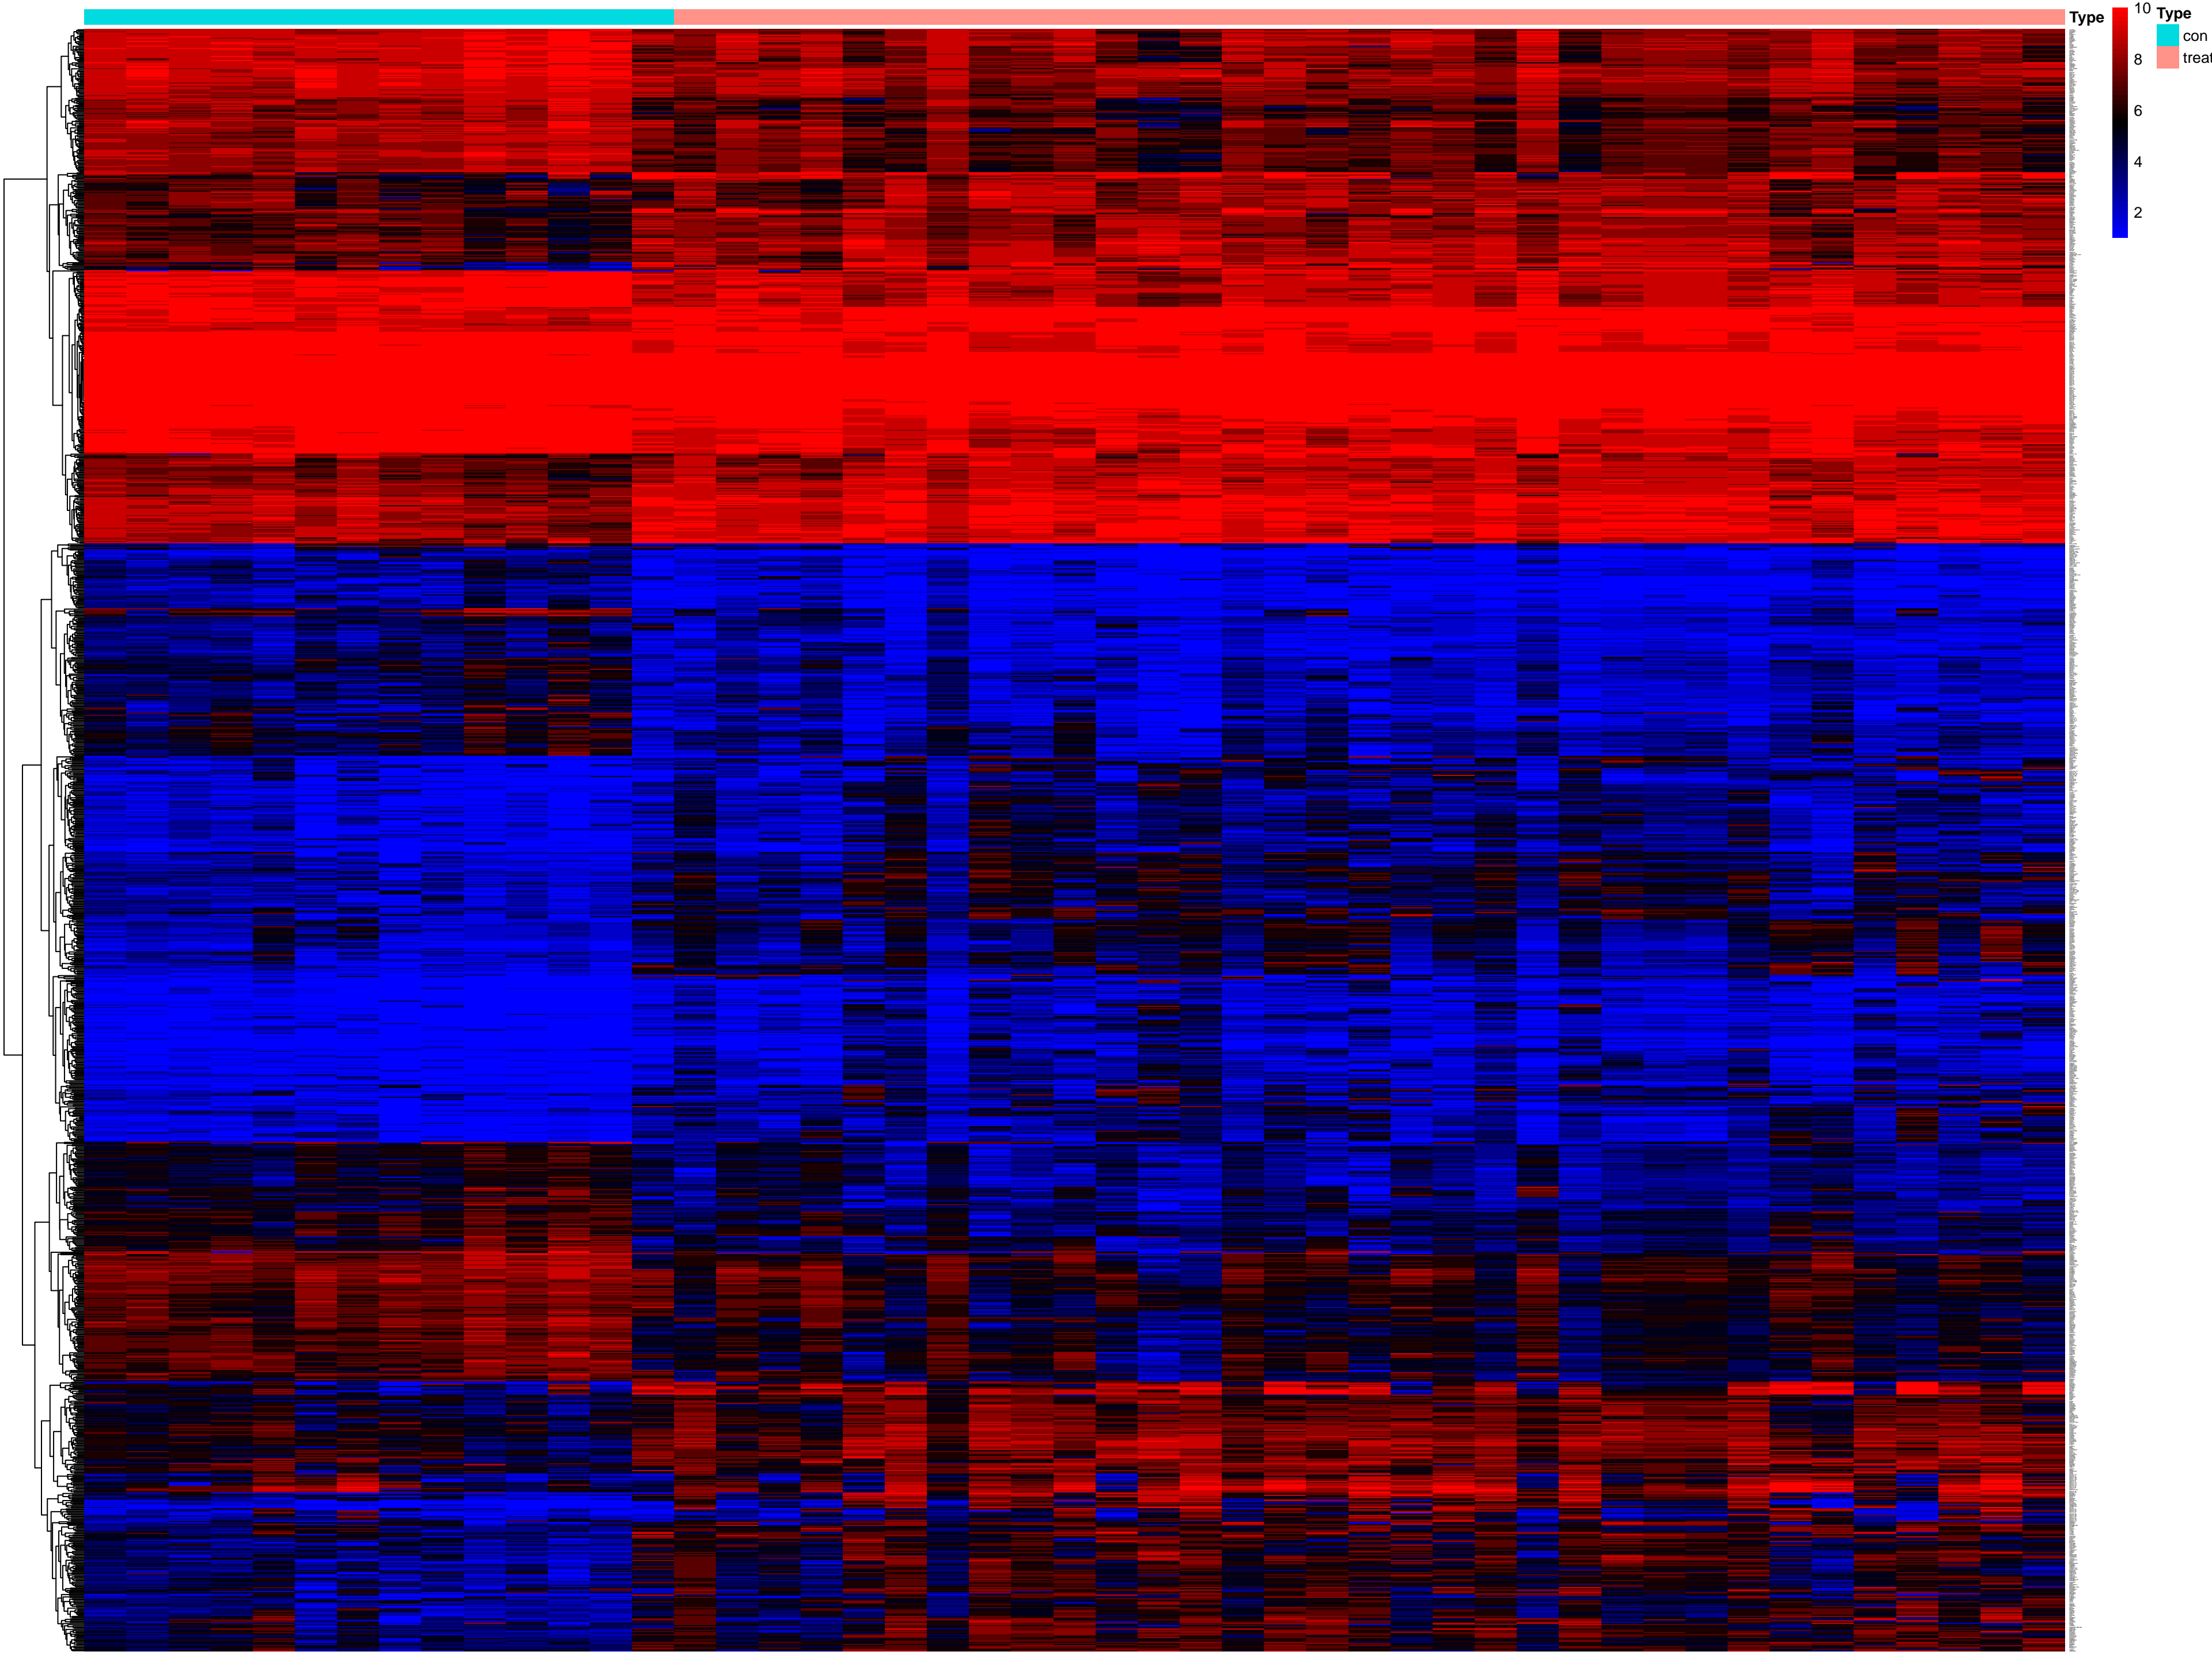

Supplement: FigureS1.pdf [file FigureS1.pdf]
