# Supplementary material for: Identification and validation of shared gene signature of kidney renal clear cell carcinoma and COVID-19
Source: PeerJ journal article supplement (doi:10.7717/peerj.16927), 2024-03-04

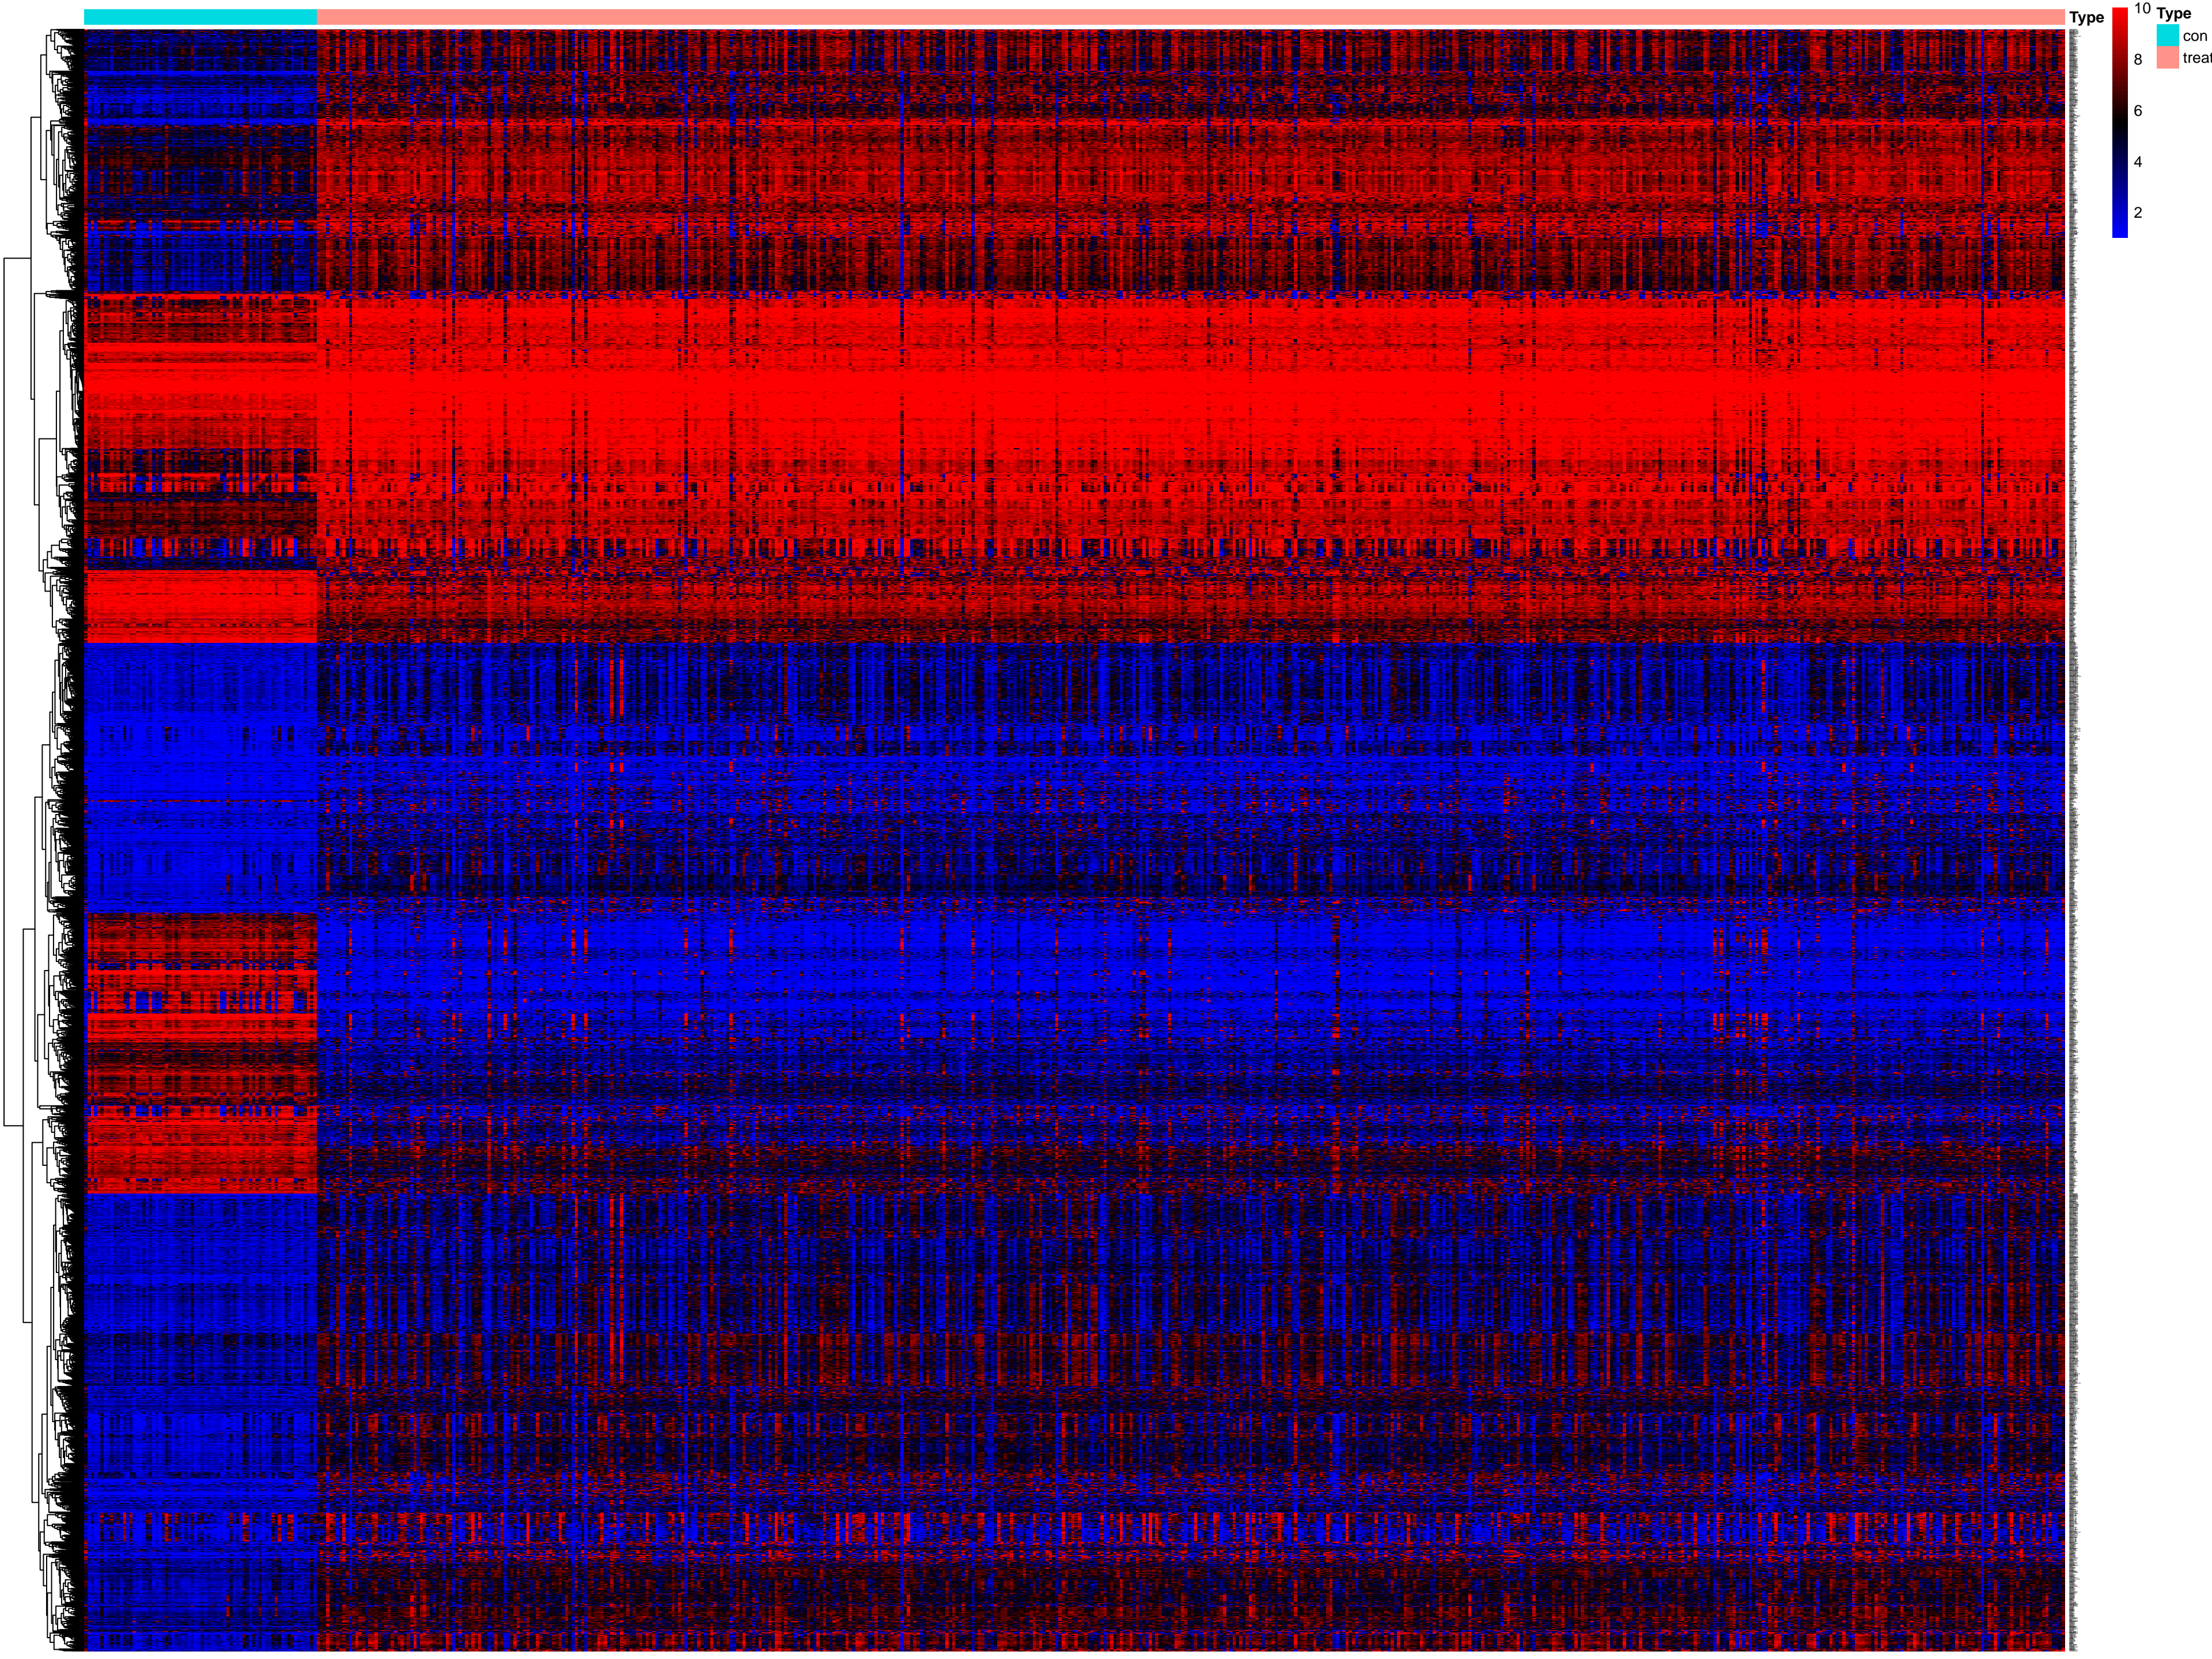

Supplement: FigureS2.pdf [file FigureS2.pdf]
