# Supplementary material for: Identification and validation of shared gene signature of kidney renal clear cell carcinoma and COVID-19
Source: PeerJ. 2024 Mar 4;12:e16927. doi: 10.7717/peerj.16927 (PMC10921934; doi:10.7717/peerj.16927)
Supplement: Supplemental Information 6 [file peerj-12-16927-s006.xls]

## Sheet: Supplementary Table S1
id	HR	HR.95L	HR.95H	pvalue
ANLN	1.76126	1.39241	2.2278	2.34616e-06
COL9A2	1.49575	1.18579	1.88673	0.000678186
ASPM	2.70431	1.88145	3.88706	7.68338e-08
CLEC2D	1.61107	1.18587	2.18873	0.00228576
TRIP13	2.2247	1.58159	3.12931	4.36026e-06
GTSE1	2.71495	2.0334	3.62494	1.26945e-11
NDC80	2.66752	1.9452	3.65807	1.13174e-09
ADAMTS2	1.35261	1.03487	1.76793	0.0270486
TPX2	1.81719	1.48588	2.22238	6.02995e-09
FER1L4	1.23436	1.00124	1.52176	0.0486617
BIRC5	1.74429	1.41978	2.14297	1.17572e-07
KIF4A	2.15161	1.65013	2.8055	1.52062e-08
CDC45	2.13589	1.50808	3.02506	1.92427e-05
CDC6	2.08007	1.43099	3.02356	0.000124132
CENPM	1.65535	1.32491	2.0682	9.14914e-06
MYBL2	1.63903	1.37058	1.96007	6.16367e-08
CEACAM4	2.83416	1.86745	4.3013	9.86234e-07
CADM4	1.24967	1.05556	1.47947	0.00966161
GRB10	0.569115	0.441734	0.73323	1.29926e-05
RAPGEFL1	1.69524	1.28132	2.24286	0.000219347
NCAPG	2.72258	1.95634	3.78893	2.85779e-09
FOXM1	1.87416	1.52673	2.30066	1.91606e-09
KIF20A	2.07955	1.66118	2.60329	1.6762e-10
HRH2	0.805024	0.698666	0.927573	0.00270078
CENPA	2.38226	1.79598	3.15991	1.71697e-09
CDC20	1.83958	1.50441	2.24943	2.85838e-09
CENPF	2.14972	1.6333	2.82944	4.76473e-08
PLAU	1.45727	1.18412	1.79342	0.000376775
HJURP	2.4823	1.85921	3.31421	7.03765e-10
TNFAIP6	0.866243	0.769824	0.974737	0.0170813
DLGAP5	2.00185	1.54273	2.5976	1.77244e-07
TNNI2	1.5004	1.02756	2.19082	0.0356647
TOP2A	1.7875	1.39692	2.28728	3.88688e-06
TROAP	2.10855	1.64385	2.70463	4.2807e-09
HLX	1.5429	1.09259	2.17881	0.0137842
HECW2	0.428815	0.300684	0.611548	2.93596e-06
CLEC18B	0.796288	0.68456	0.926252	0.0031458
DTL	1.51556	1.01608	2.26059	0.0415361
CDCA5	2.03614	1.53527	2.7004	7.97601e-07
MKI67	2.07659	1.55573	2.77183	7.06979e-07
FCGR1A	1.55548	1.20786	2.00313	0.000618504
SPC25	1.5811	1.01982	2.45129	0.0405892
LY96	1.43052	1.1582	1.76688	0.000890235
VSIG4	1.22284	1.00091	1.49398	0.0489641
KCNMA1	0.586949	0.427353	0.806145	0.000998512
CCNB2	2.05889	1.61854	2.61905	4.05847e-09
PAQR6	1.34511	1.04658	1.72879	0.0205814
SPC24	1.6921	1.36577	2.09642	1.4984e-06
TGFA	0.777148	0.663021	0.91092	0.00186245
AIM2	1.64963	1.33908	2.0322	2.55375e-06
PTPN13	0.662554	0.497037	0.883191	0.00500147
MICALL2	1.73529	1.33735	2.25164	3.3655e-05
ABCA1	0.753969	0.58362	0.974039	0.0306747
MELK	2.00181	1.46364	2.73785	1.39678e-05
SKA3	2.62686	1.74209	3.961	4.0473e-06
PLK1	2.48188	1.88788	3.26279	7.38205e-11
CDT1	1.55536	1.15828	2.08858	0.00331472
BUB1	2.15312	1.62608	2.85097	8.59963e-08
MZB1	1.19738	1.0619	1.35014	0.00327843
OSCAR	1.79179	1.34114	2.39386	7.95185e-05
NINJ2	1.50957	1.09868	2.07413	0.0110692
RRM2	2.01318	1.53358	2.64276	4.65621e-07
GPR171	1.36525	1.01203	1.84175	0.0415221
UBE2C	1.68872	1.45184	1.96425	1.08419e-11
AURKB	2.02174	1.63656	2.49758	6.67577e-11
PYCR1	1.65334	1.38018	1.98057	4.84174e-08
KIF18B	2.33758	1.76615	3.09388	2.90086e-09
CXCR3	1.23497	1.0192	1.49643	0.0312378
VWA7	0.666968	0.459839	0.967397	0.0327881
IGLV3-27	1.14161	1.0085	1.29229	0.0362793
IGLV3-21	1.12632	1.04241	1.21698	0.00259829
IGLV3-19	1.0855	1.00295	1.17485	0.0420581
IGHA1	1.11421	1.01971	1.21748	0.0167756
IGHG3	1.10241	1.02163	1.18959	0.0120395
IGHV1-46	1.11273	1.00922	1.22685	0.0320126
IGHV1-69	1.16872	1.05945	1.28925	0.00185067
MXD3	2.57782	1.80158	3.68851	2.21612e-07
LTB4R	1.54334	1.18912	2.00308	0.00110622
IGLV9-49	1.15505	1.04909	1.27171	0.00332238
KIFC1	2.01192	1.53624	2.63487	3.78374e-07
IGLL5	1.34223	1.09583	1.64403	0.00445036
HP	1.11454	1.02507	1.21183	0.0110872
FCGR1CP	2.05559	1.40967	2.9975	0.000181113
